# Supplementary material for: Plant Metabolomics as a Tool for Detecting Adulterants in Edible Plant: A Case Study of Allium ursinum
Source: MDPI journal article supplement (doi:10.3390/metabo12090849), 2022-09-09
Supplement: s1 [file s1]

**Plant metabolomics as a tool for detecting poisonous adulterants in edible plant: a case study of *Allium ursinum***

**Stefan Ivanović<sup>1</sup>, Katarina Simić<sup>1</sup>, Stefan Lekić<sup>2</sup>, Milka Jadranin<sup>1</sup>, Ljubodrag Vujisić<sup>2</sup> Dejan Gođevac<sup>1</sup>**

<sup>1</sup>University of Belgrade - Institute of Chemistry, Technology and Metallurgy, National Institute of the Republic of Serbia, Njegoševa 12, 11000 Belgrade, Serbia

<sup>2</sup>University of Belgrade – Faculty of Chemistry, Belgrade, Serbia

**Supplementary Material**

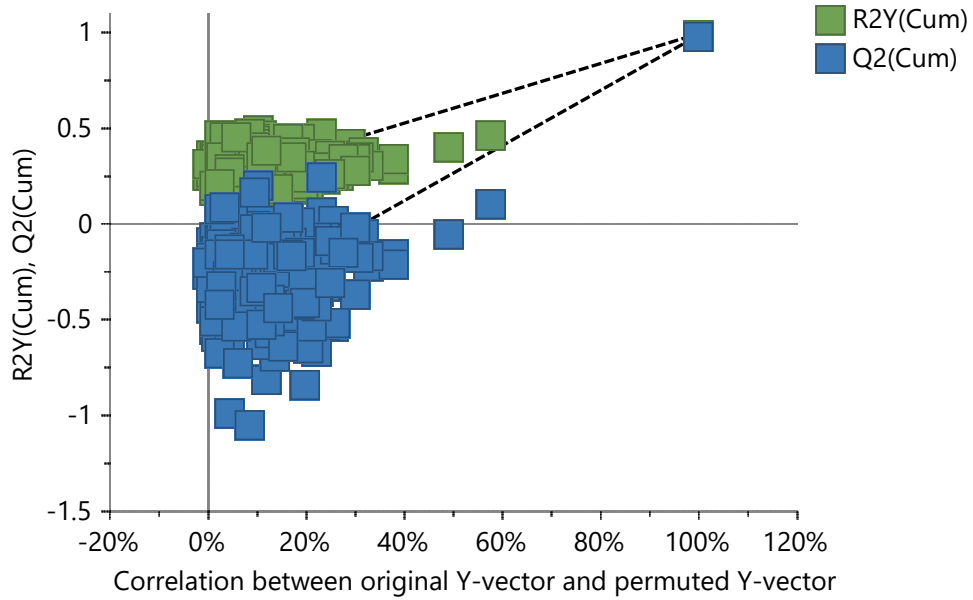

Figure S1. Permutation test (N = 200) of the OPLS model comprising *A. ursinum* adulterated with *C. majalis*

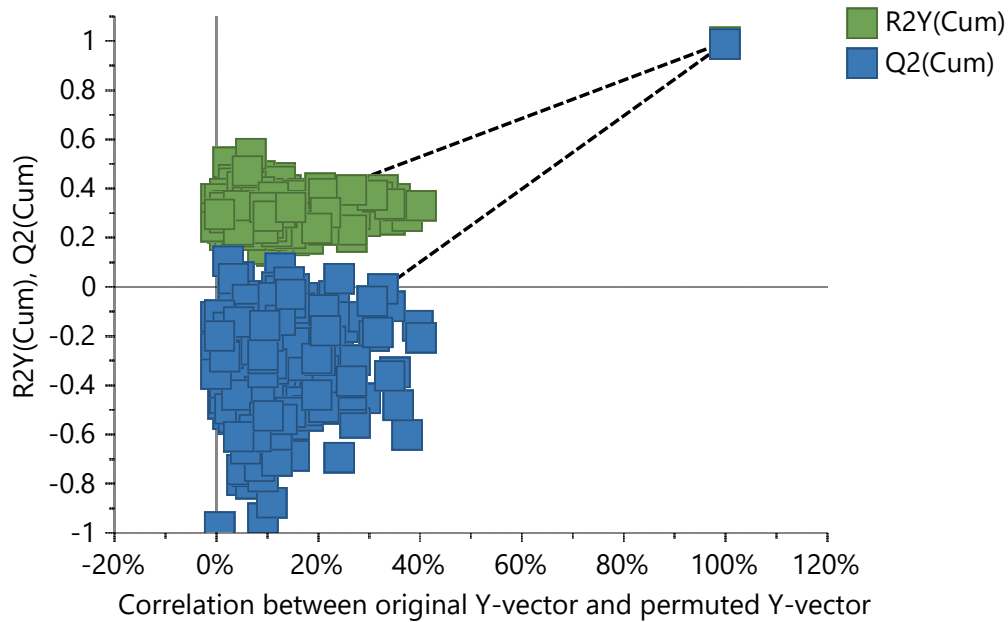

Figure S2. Permutation test (N = 200) of the OPLS model comprising *A. ursinum* adulterated with *A. maculatum*

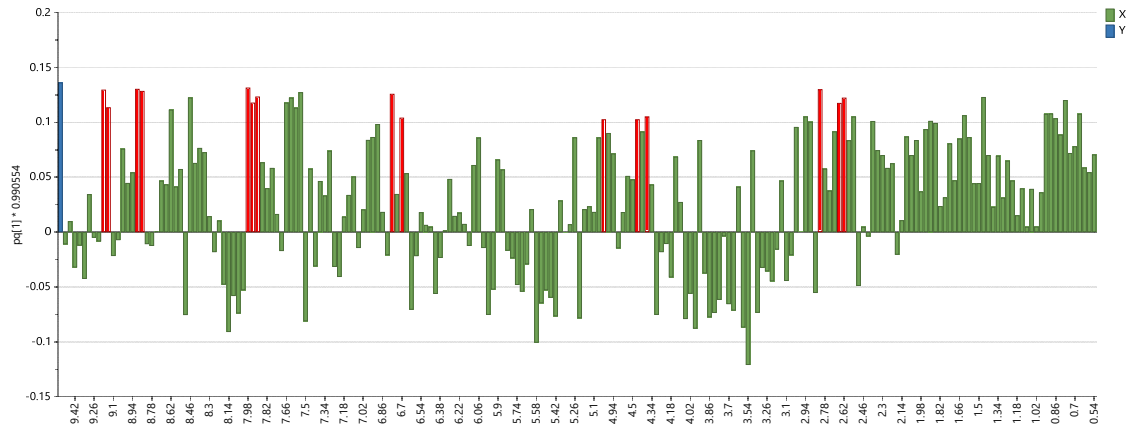

Figure S3. Loading plot of the OPLS model comprising *A. ursinum* adulterated with *C. majalis*. The most influential variables with the variable influence on projection (VIP) scores over 1.5 are marked red.

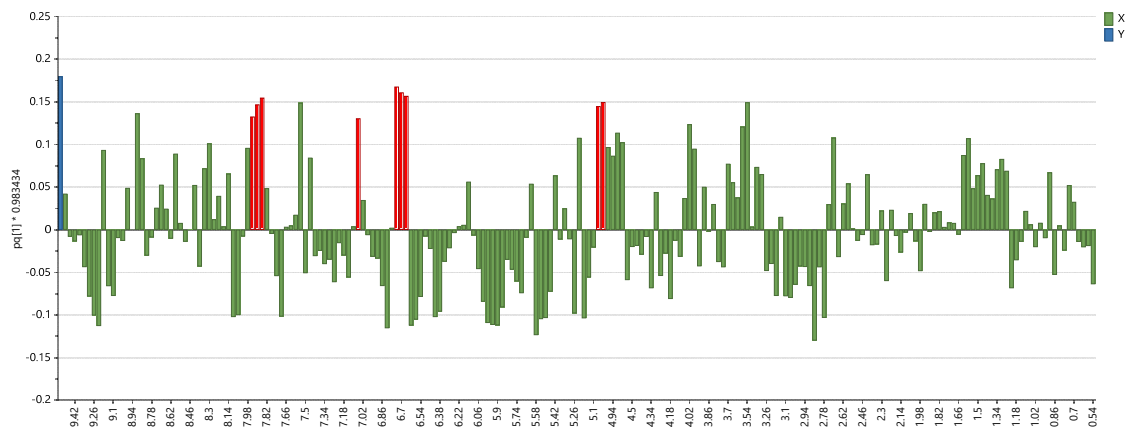

Figure S4. Loading plot of the OPLS model comprising *A. ursinum* adulterated with *A. maculatum*. The most influential variables with the variable influence on projection (VIP) scores over 1.5 are marked red.

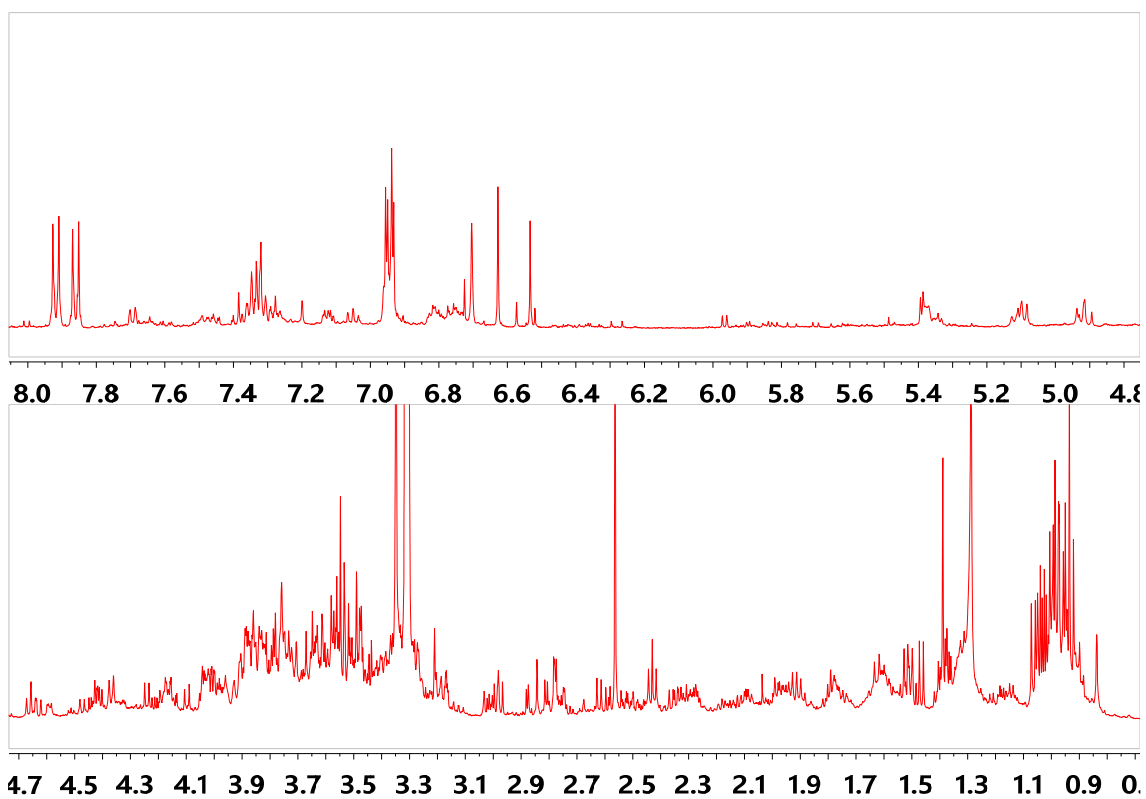

Figure S5. <sup>1</sup>H NMR spectrum of the *n*-butanol extract of *C. majalis* containing isovitexin (**1**) and vicenin II (**2**).

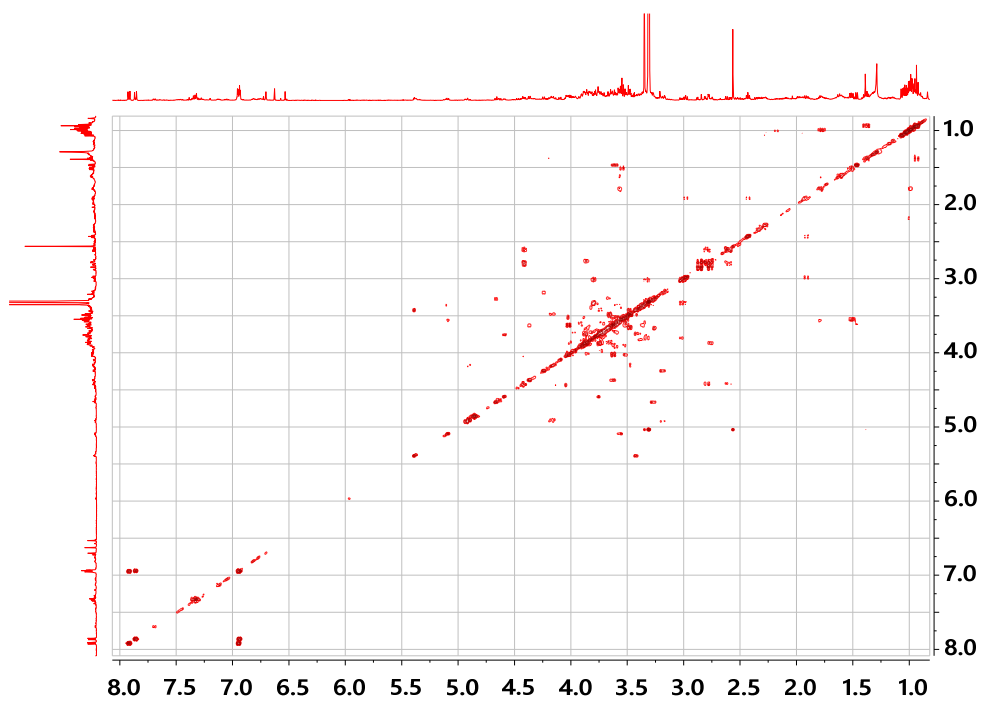

Figure S6. COSY spectrum of the *n*-butanol extract of *C. majalis* containing isovitexin (**1**) and vicenin II (**2**).

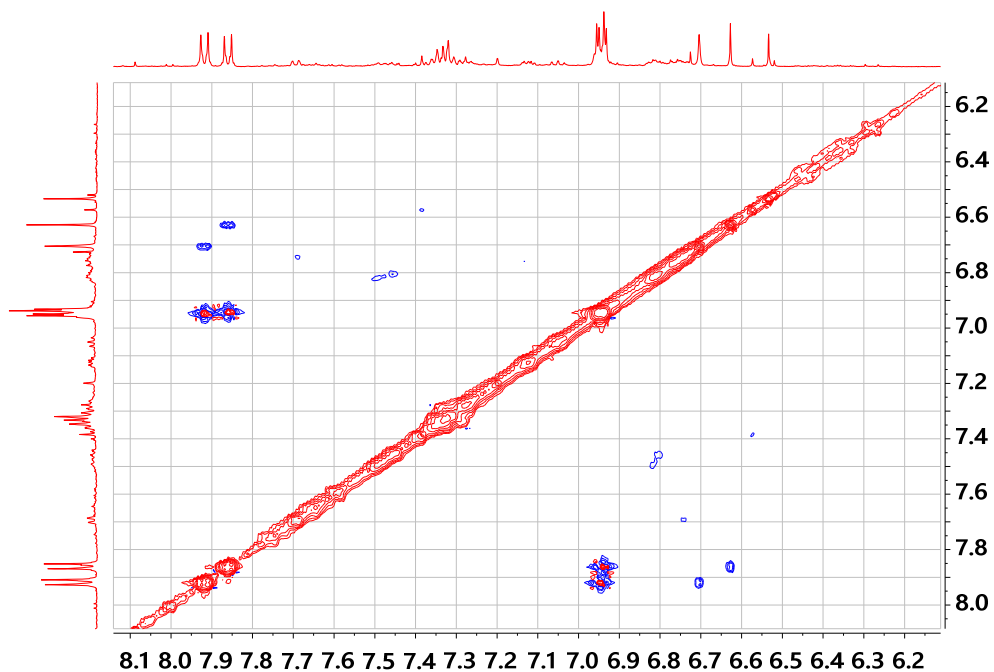

Figure S7. A part of NOESY spectrum of the *n*-butanol extract of *C. majalis* containing isovitexin (**1**) and vicenin II (**2**).

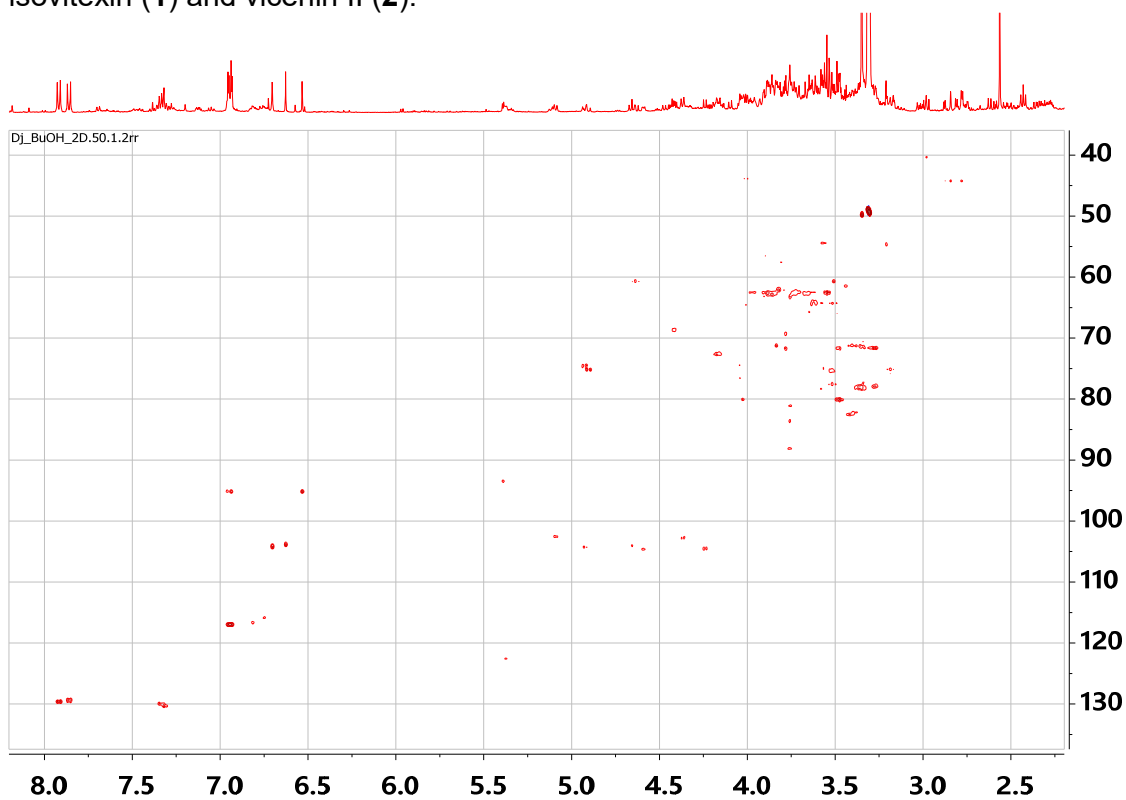

Figure S8. HSQC spectrum of the *n*-butanol extract of *C. majalis* containing isovitexin (**1**) and vicenin II (**2**).

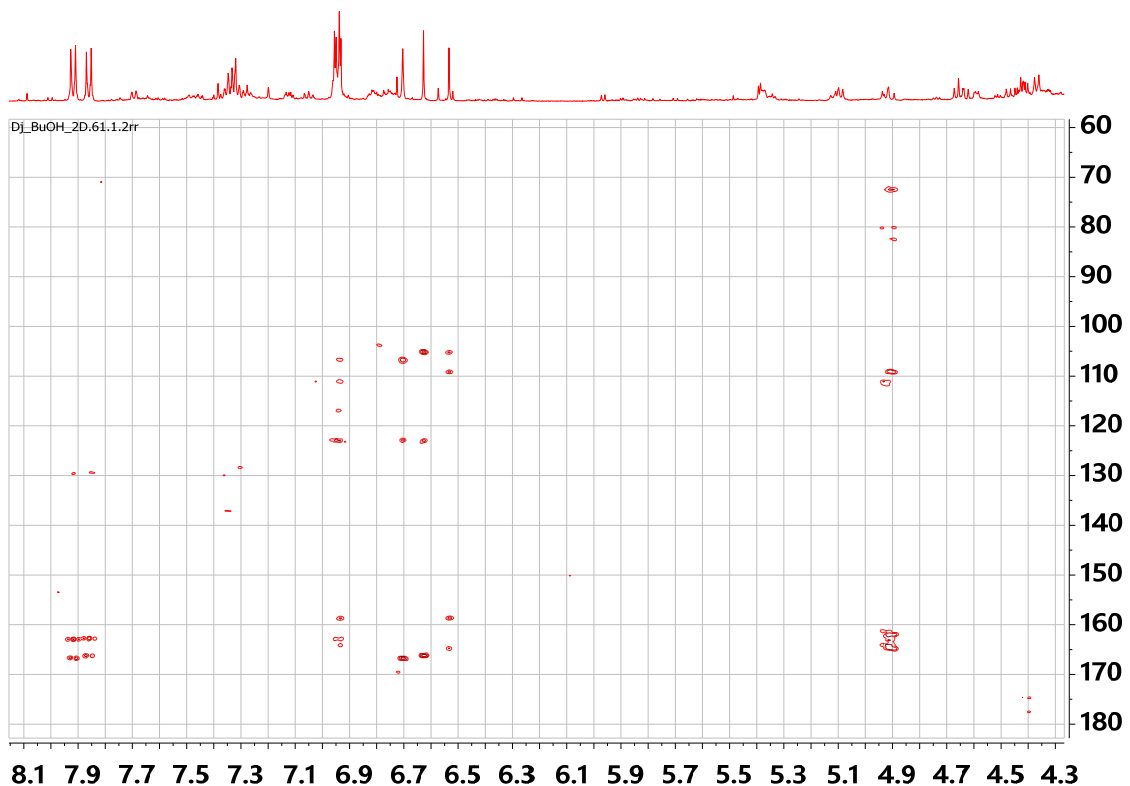

8.1 7.9 7.7 7.5 7.3 7.1 6.9 6.7 6.5 6.3 6.1 5.9 5.7 5.5 5.3 5.1 4.9 4.7 4.5 4.3  
 Figure S9. A part of HMBC spectrum of the *n*-butanol extract of *C. majalis* containing isovitexin (1) and vicensin II (2).

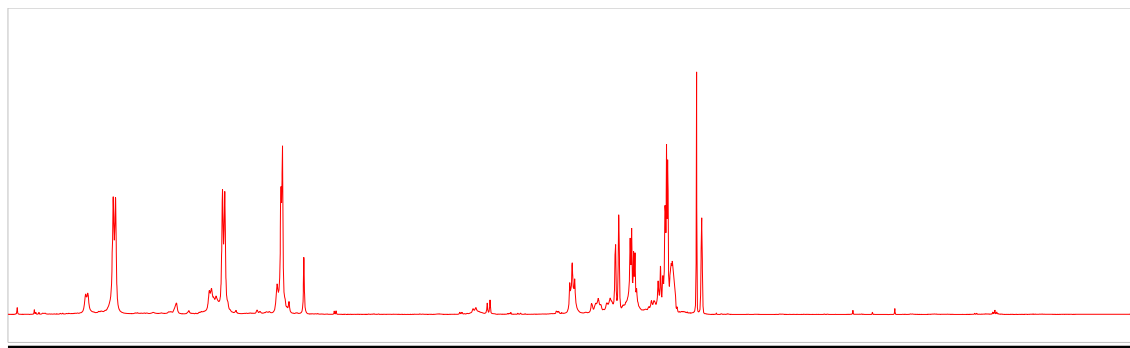

8.0 7.5 7.0 6.5 6.0 5.5 5.0 4.5 4.0 3.5 3.0 2.5 2.0 1.5 1.0 0.5  
 Figure S10.  $^1\text{H}$  NMR spectrum of the fraction of *A. maculatum* containing isovitexin (1).

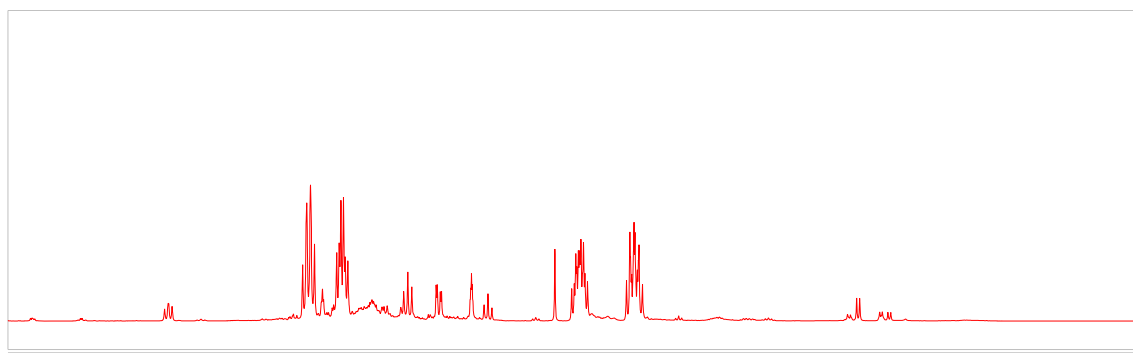

5.4 5.0 4.6 4.2 3.8 3.4 3.0 2.6 2.2 1.8 1.4 1.0 0.6 0.  
Figure S11.  $^1\text{H}$  NMR spectrum of the fraction of *C. majalis* containing azetidine-2-carboxylic acid (**3**).

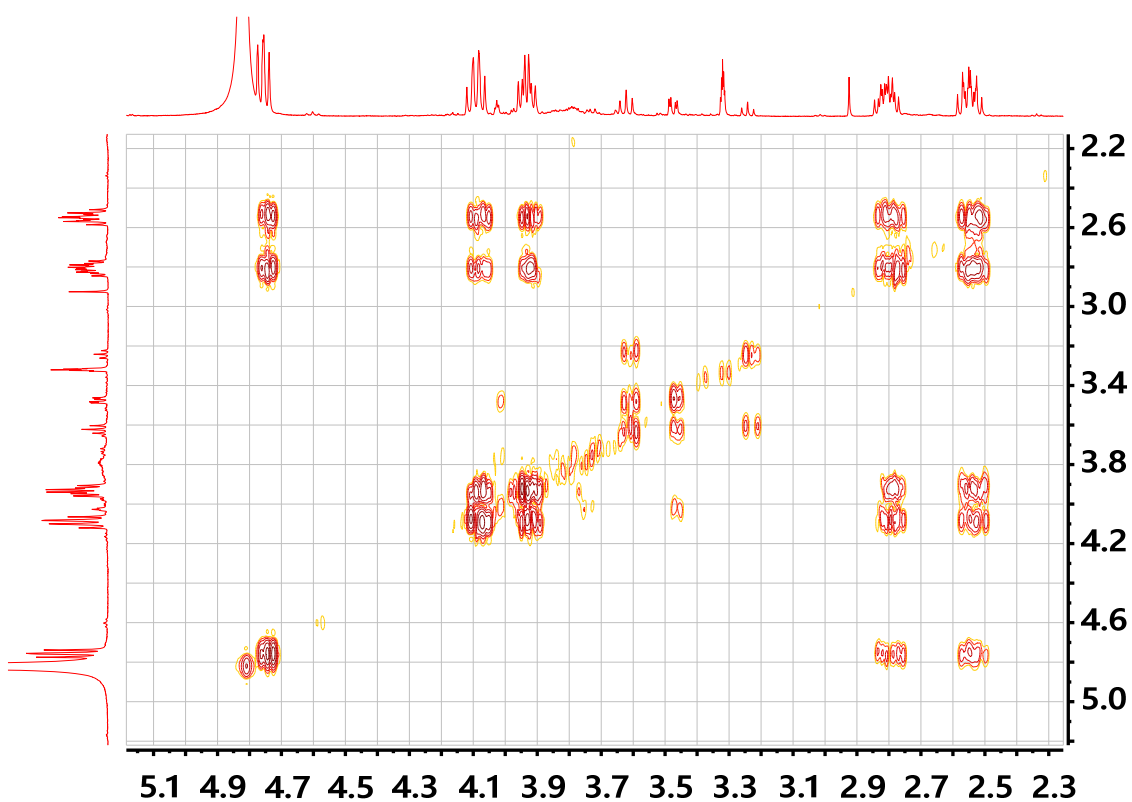

Figure S12. COSY spectrum of the fraction of *C. majalis* containing azetidine-2-carboxylic acid (**3**).

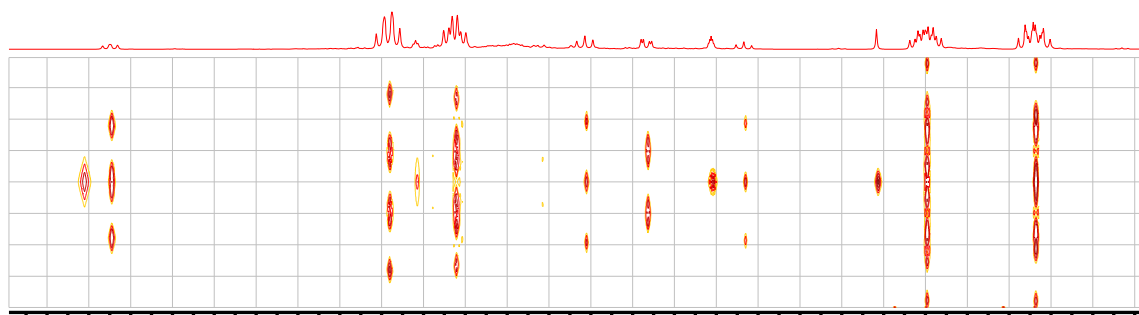

4.9 4.7 4.5 4.3 4.1 3.9 3.7 3.5 3.3 3.1 2.9 2.7 2.5 2.  
 Figure S13. Homonuclear  $J$ -resolved NMR spectrum of the fraction of *C. majalis* containing azetidine-2-carboxylic acid (**3**).

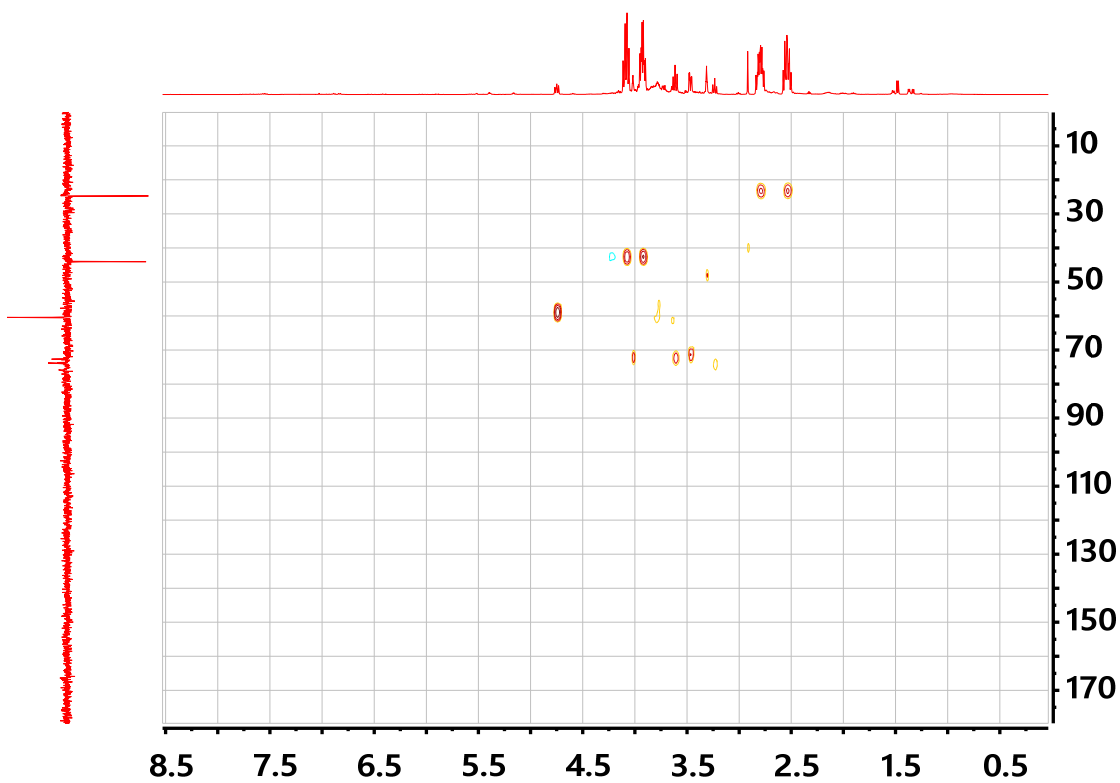

Figure S14.  $^1\text{H}$  NMR spectrum of the fraction of *C. majalis* containing azetidine-2-carboxylic acid (**3**).



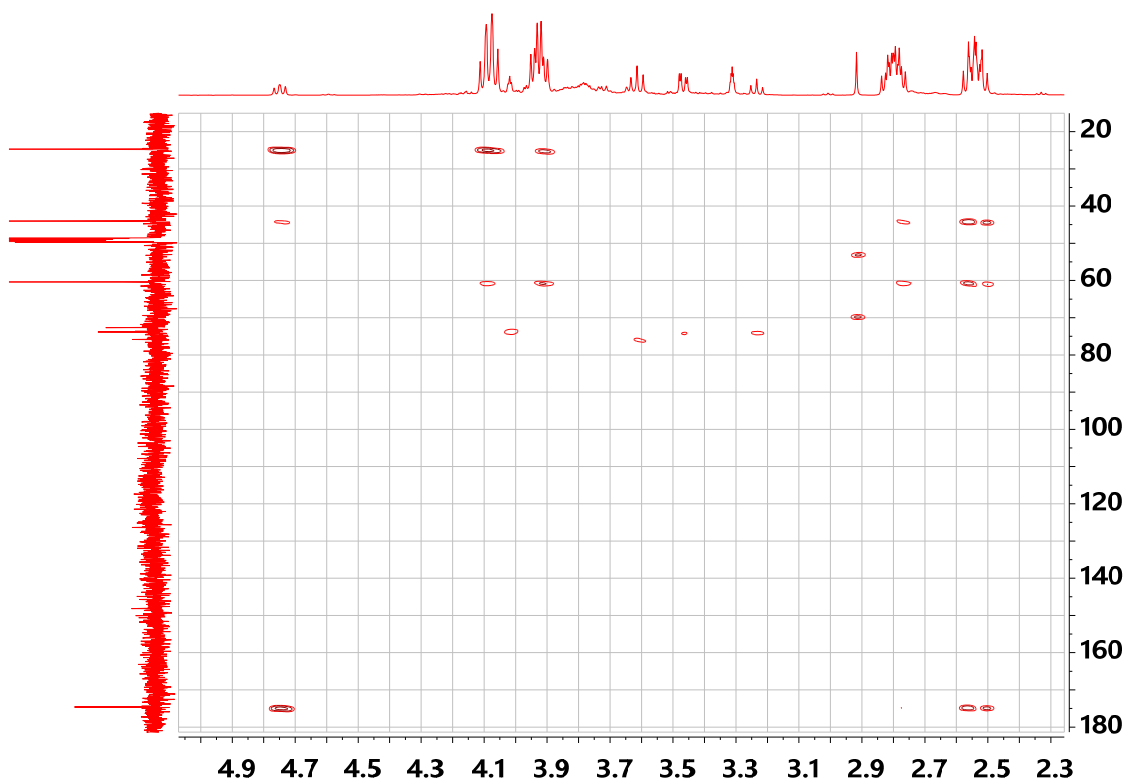

Figure S15.  $^1\text{H}$  NMR spectrum of the fraction of *C. majalis* containing azetidine-2-carboxylic acid (**3**).

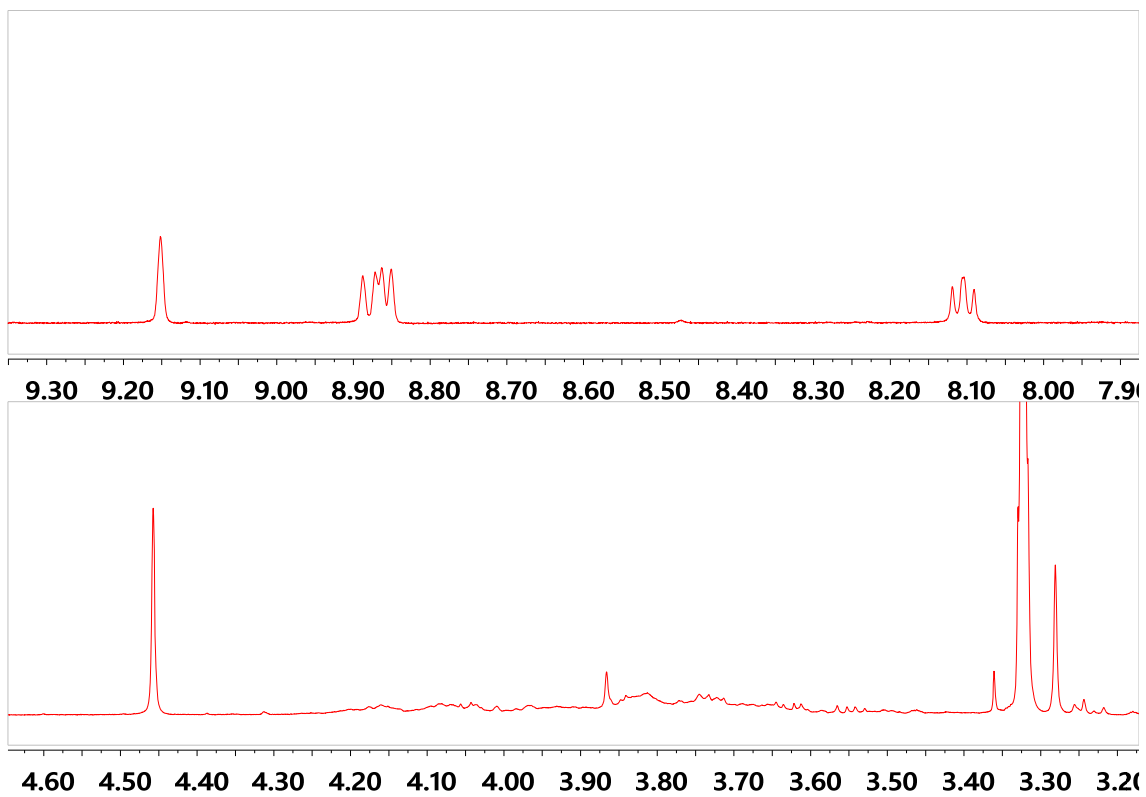

Figure S16. <sup>1</sup>H NMR spectrum of the fraction of *C. majalis* containing trigonelline (4).

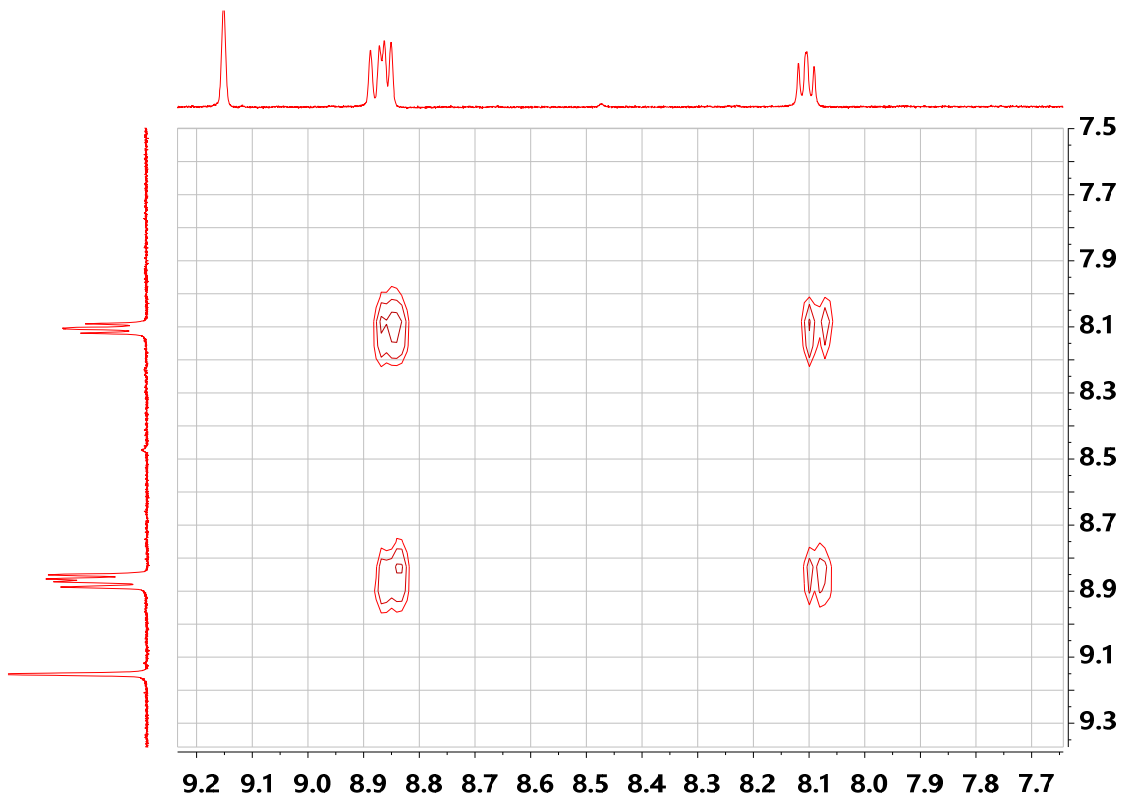

Figure S17. COSY spectrum of the fraction of *C. majalis* containing trigonelline (4).

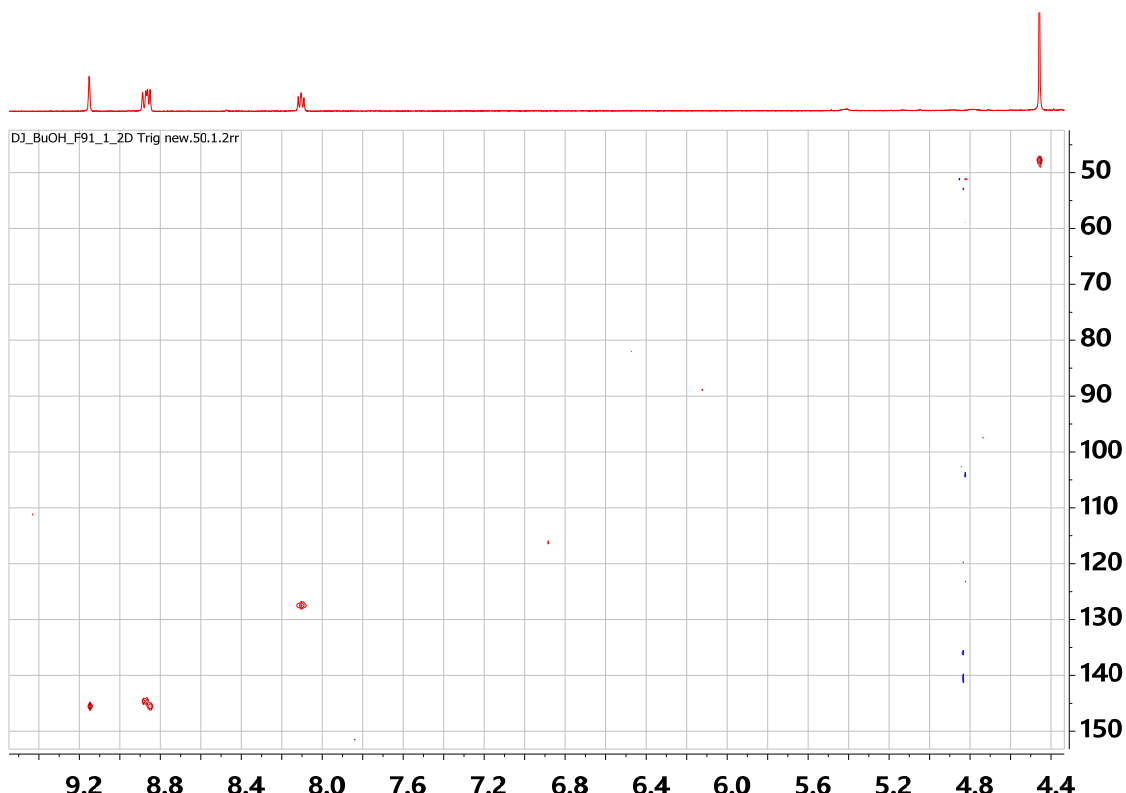

Figure S18. HSQC spectrum of the fraction of *C. majalis* containing trigonelline (4).

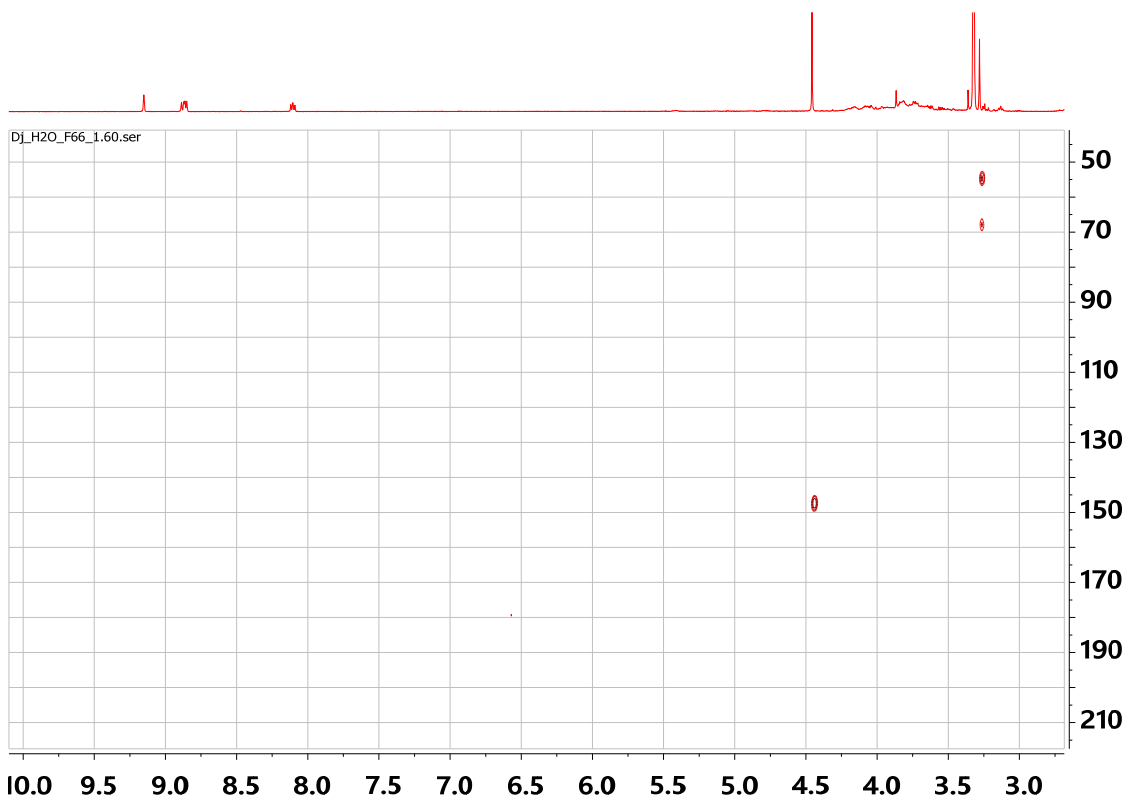

Figure S19. HMBC spectrum of the fraction of *C. majalis* containing trigonelline (4).

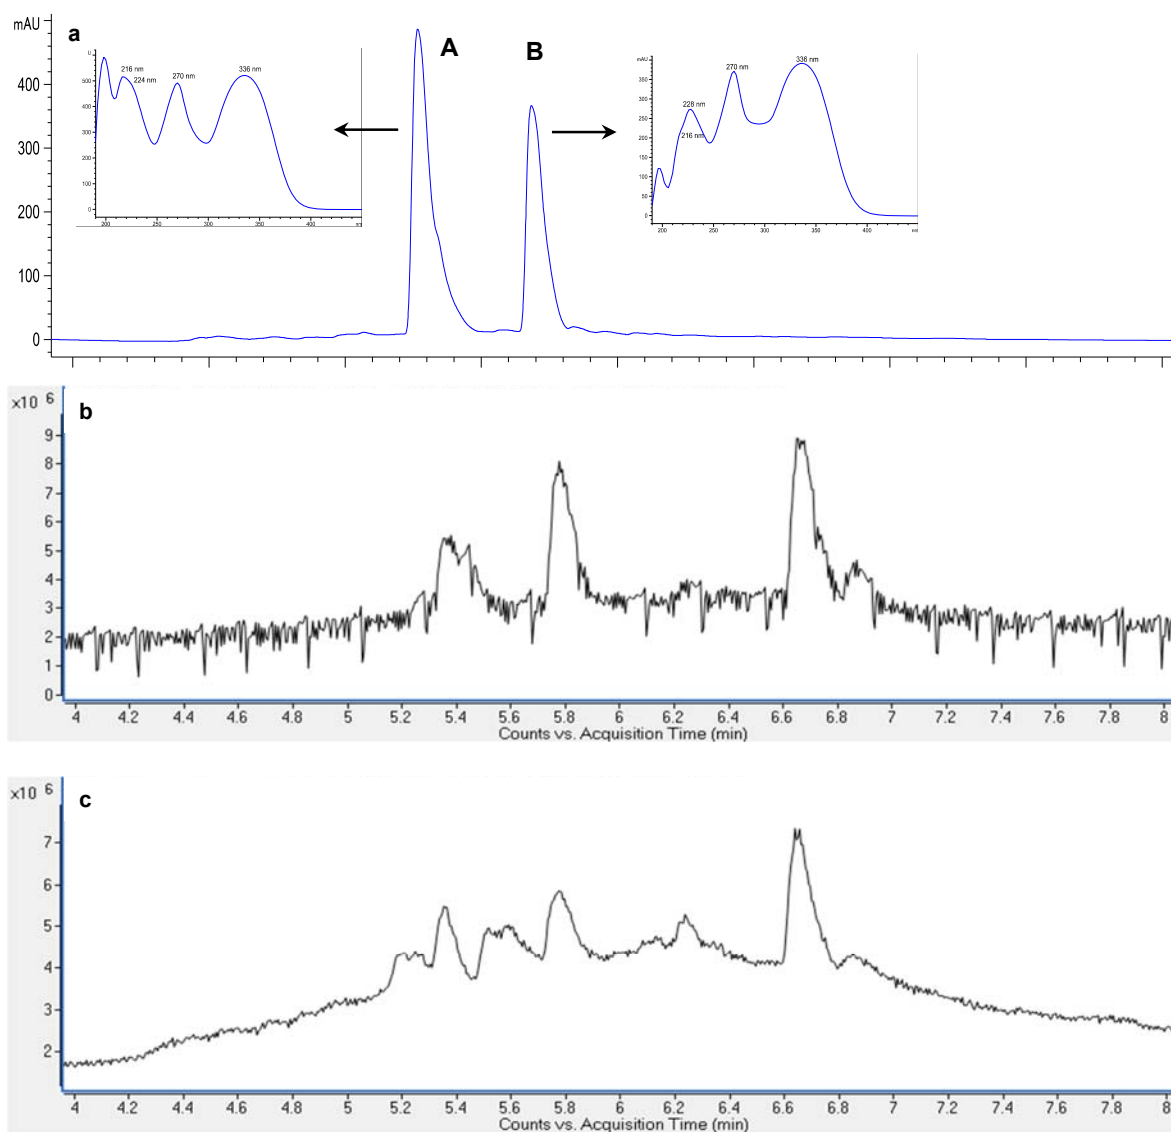

Figure S20. LC-DAD-MS analysis of the *C. majalis* extract: **a** LC-DAD (270 nm) chromatogram (4–8 min) and UV spectra of compounds **A** and **B**; **b** and **c** LC-ESI-MS total ion current (TIC) chromatograms (4–8 min) in negative and positive ionization modes, respectively.

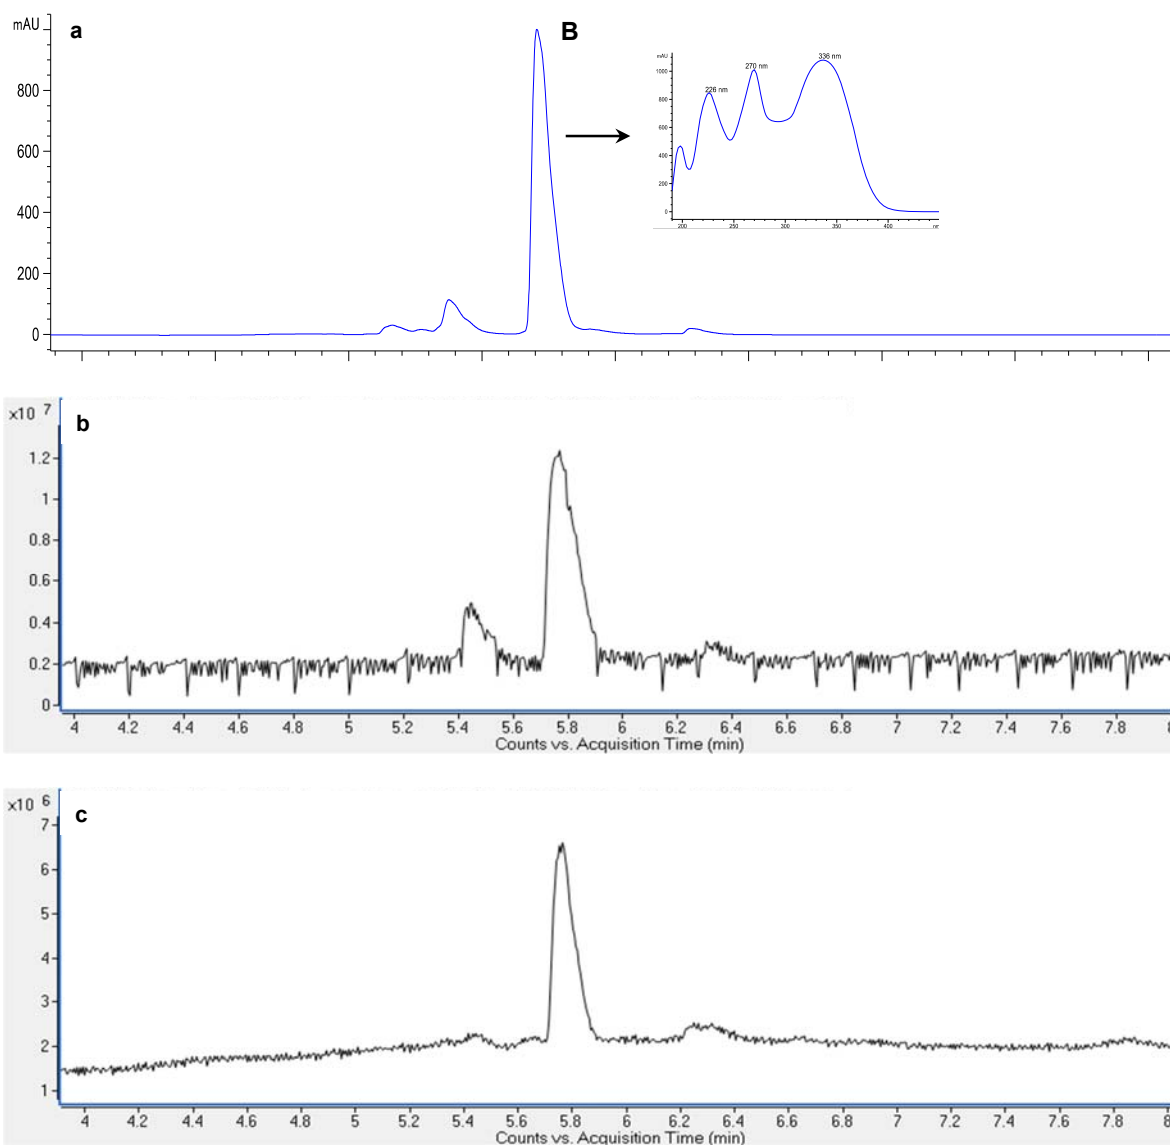

Figure S21. LC-DAD-MS analysis of the *A. maculatum* extract: **a** LC-DAD (270 nm) chromatogram (4–8 min) and UV spectrum of compound **B**; **b** and **c** LC-ESI-MS total ion current (TIC) chromatograms (4–8 min) in negative and positive ionization modes, respectively.

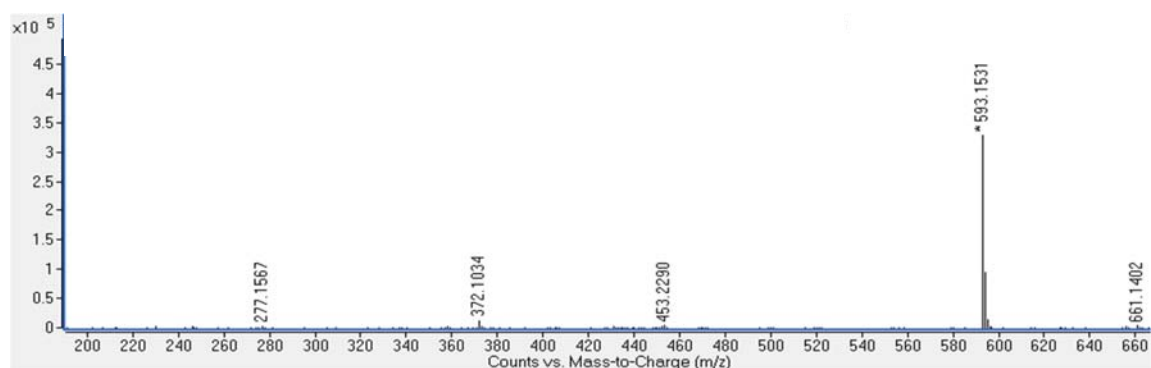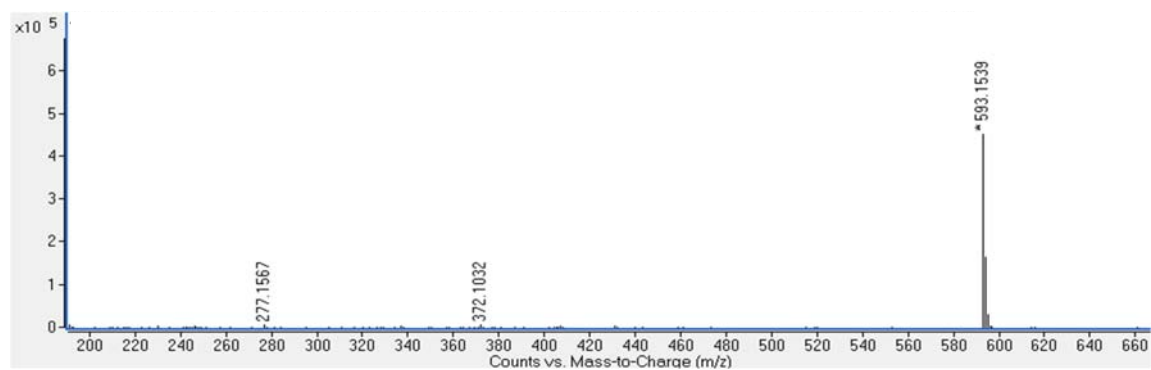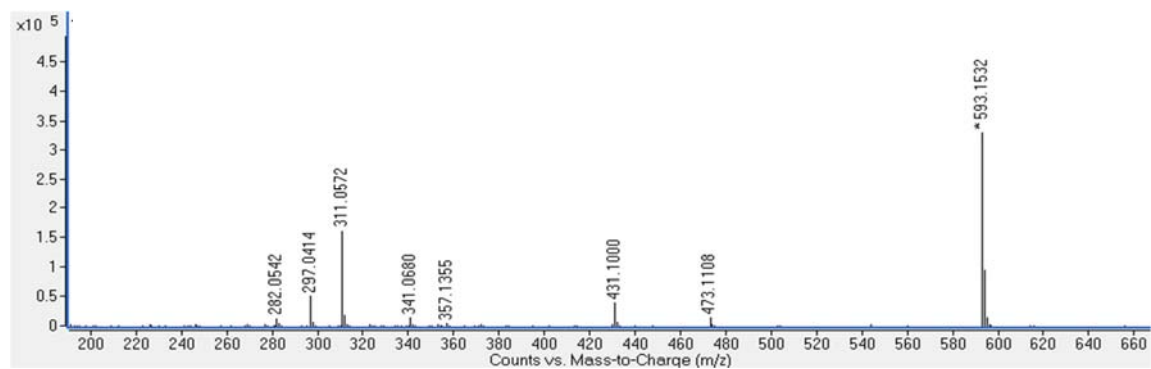

Figure S22. Negative mass spectra ( $m/z$  200–660) of the compound **A** at CE = 0, 20 and 40 V, respectively (from top to the bottom) in the TIC chromatogram of the *C. majalis* extract.

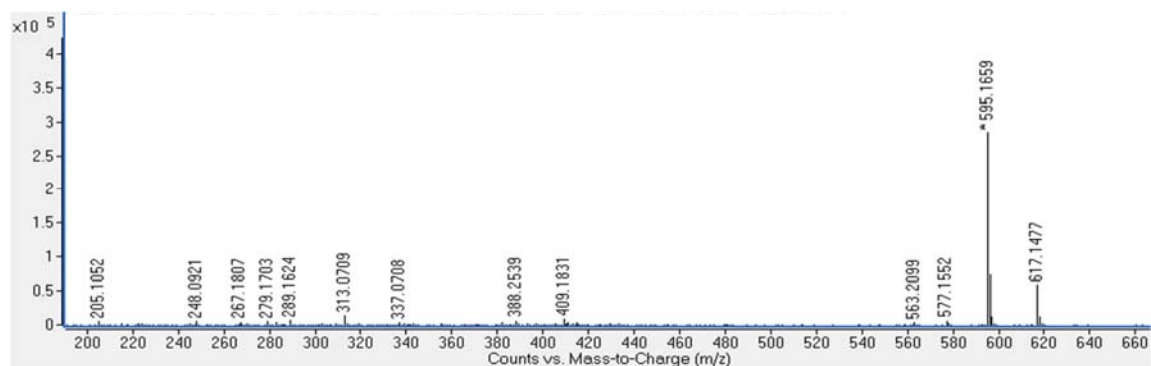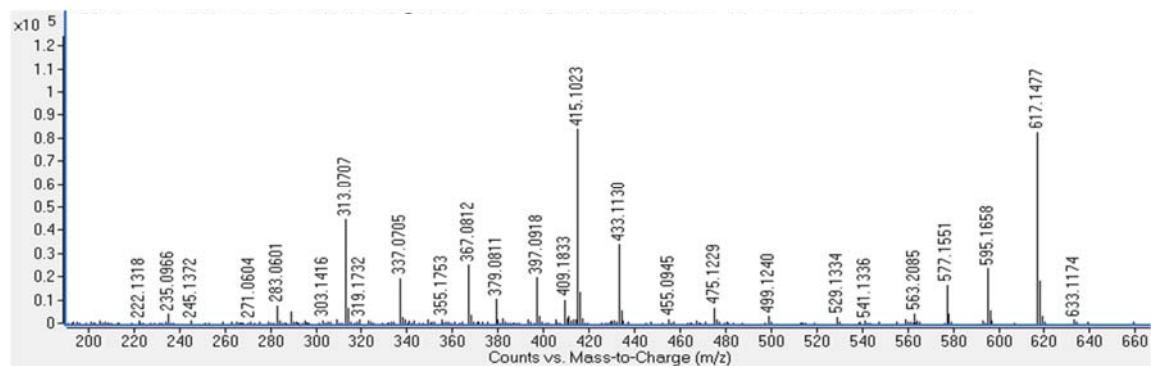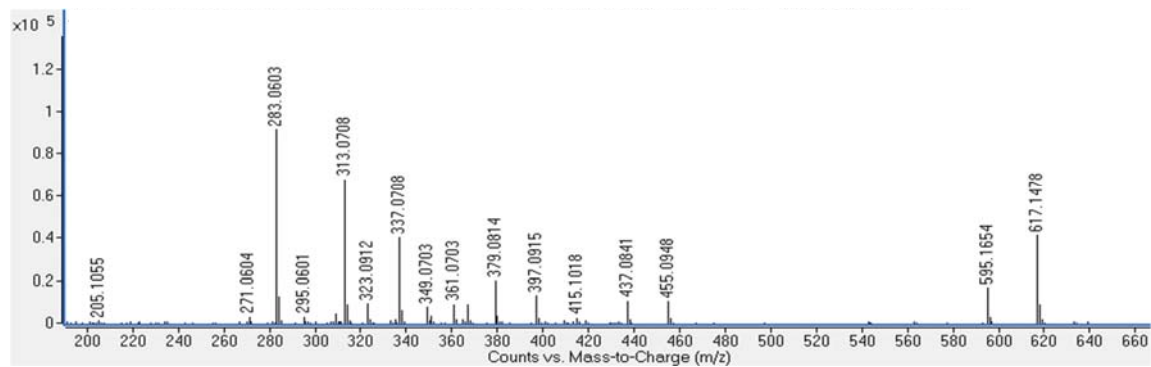

Figure S23. Positive mass spectra ( $m/z$  200–660) of the compound **A** at CE = 0, 20 and 40 V, respectively (from top to the bottom) in the TIC chromatogram of the *C. majalis* extract.

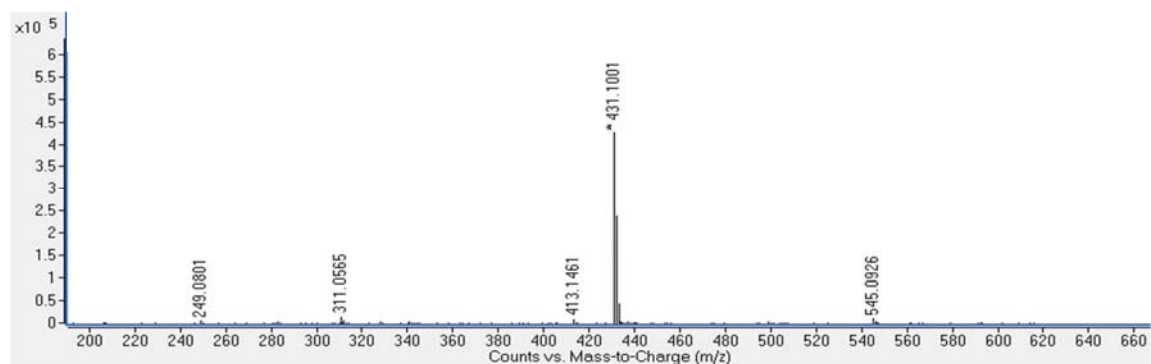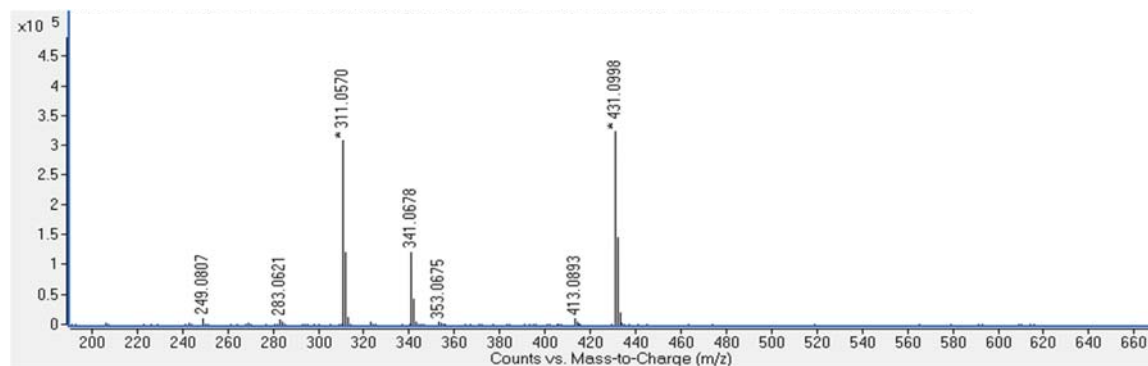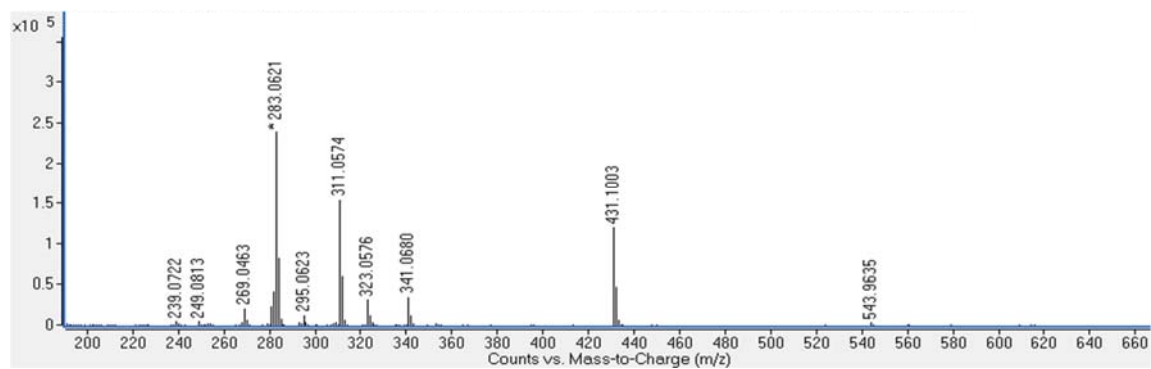

Figure S24. Negative mass spectra ( $m/z$  200–660) of the compound **B** at CE = 0, 20 and 40 V, respectively (from top to the bottom) in the TIC chromatogram of the *C. majalis* extract.



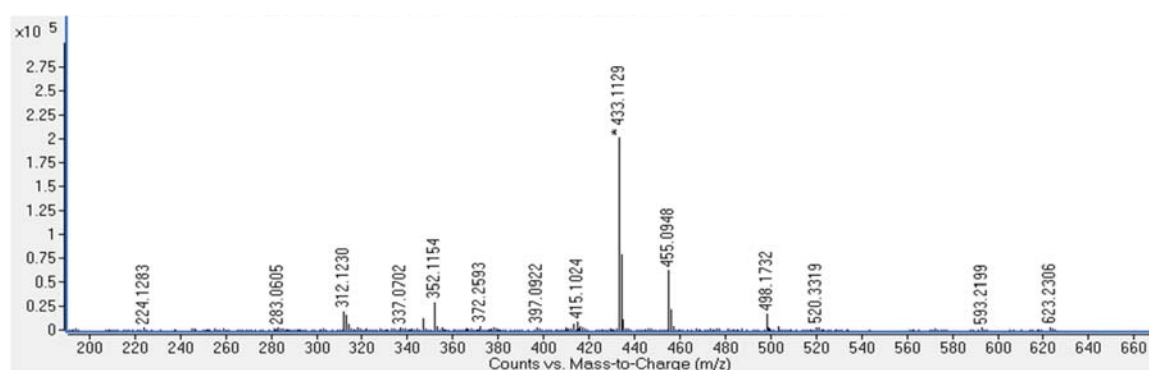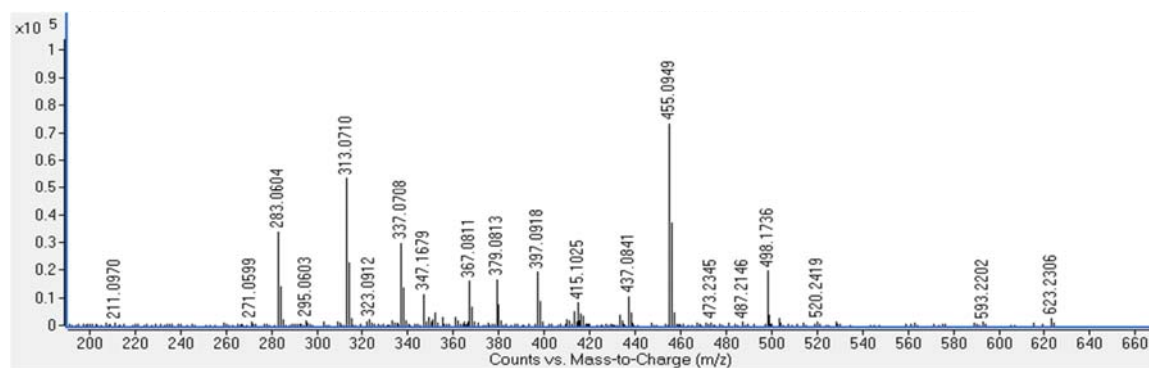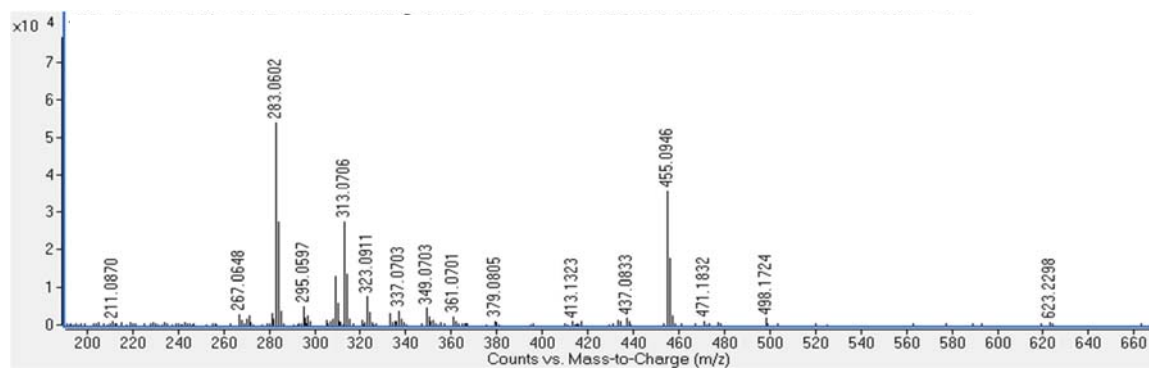

Figure S25. Positive mass spectra ( $m/z$  200–660) of the compound **B** at CE = 0, 20 and 40 V, respectively (from top to the bottom) in the TIC chromatogram of the *C. majalis* extract.

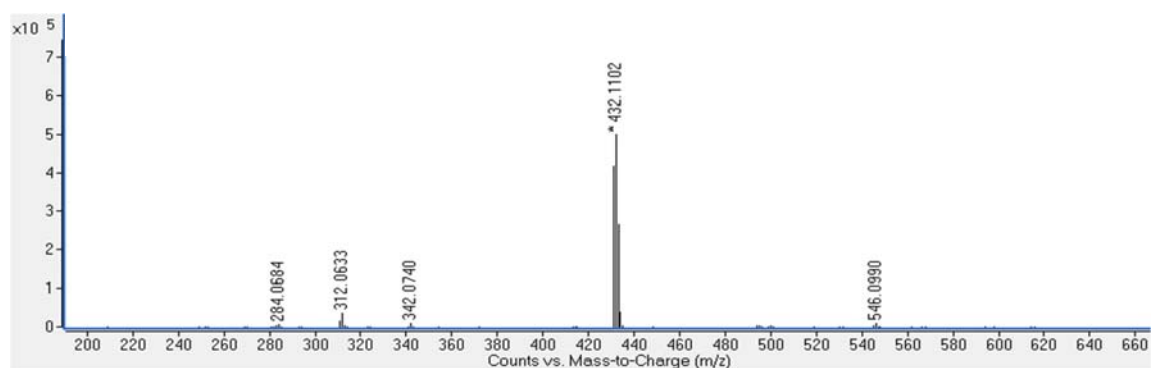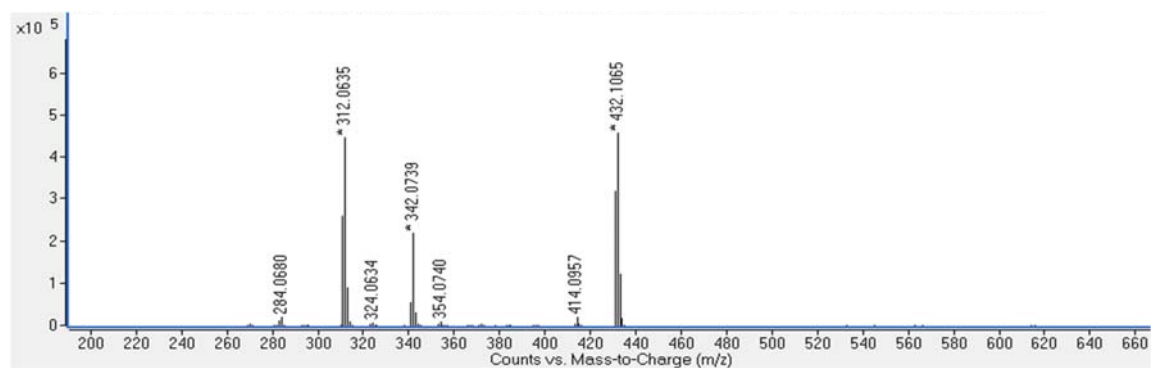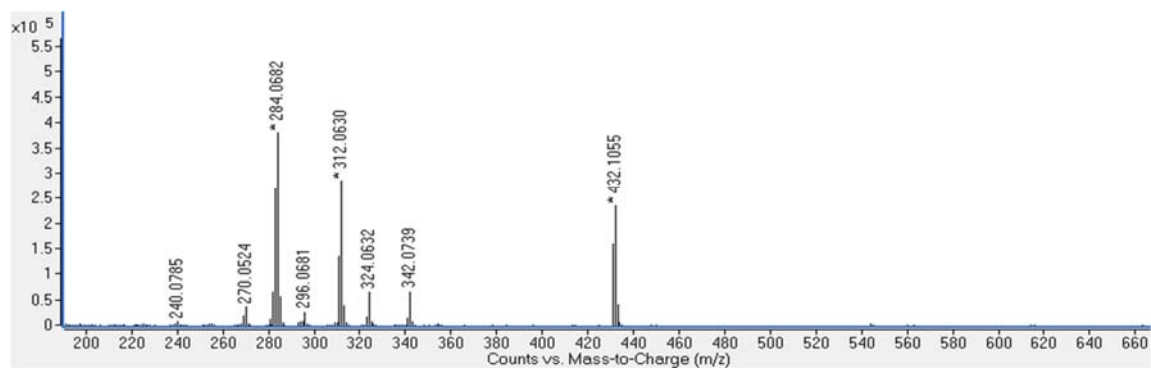

Figure S26. Negative mass spectra ( $m/z$  200–660) of the compound **B** at CE = 0, 20 and 40 V, respectively (from top to the bottom) in the TIC chromatogram of the *A. maculatum* extract.

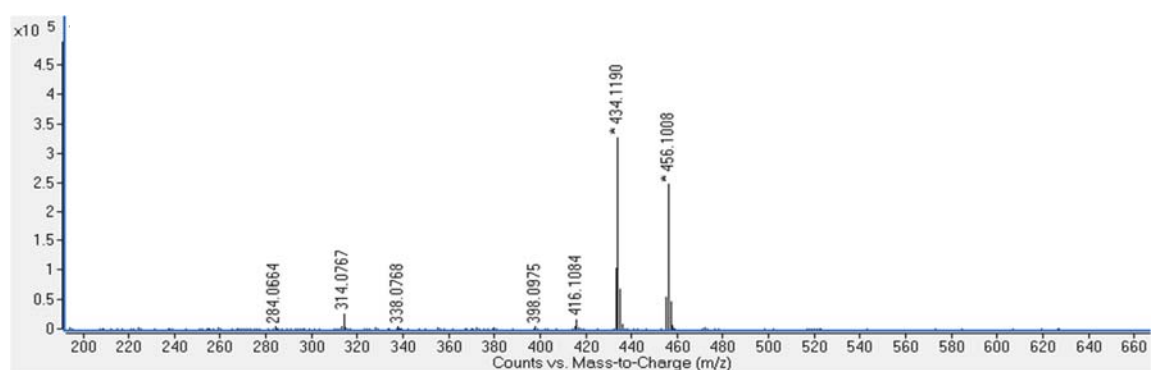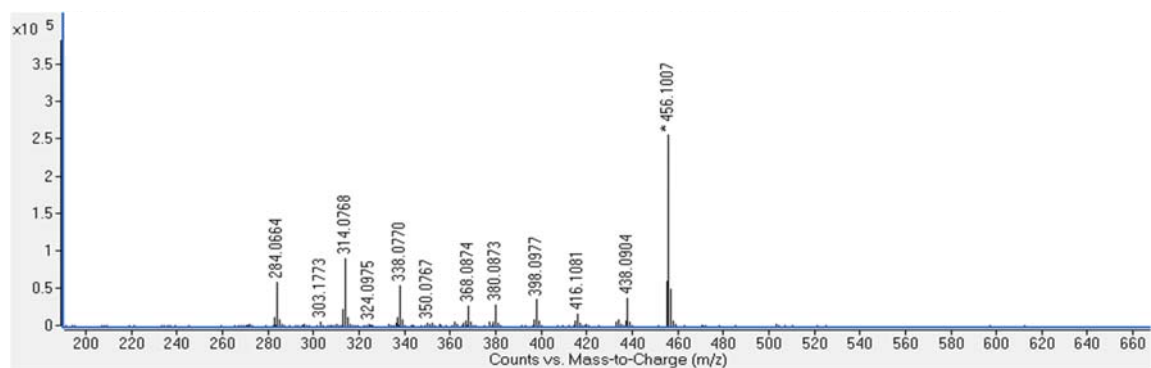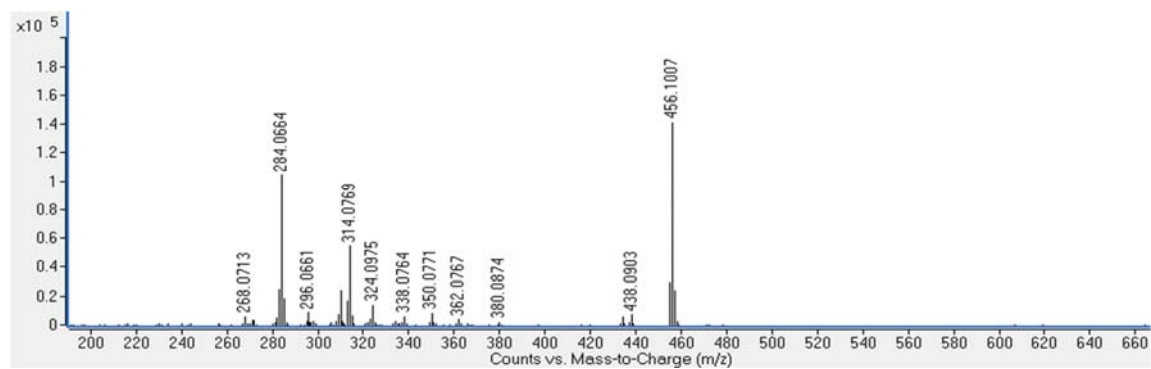

Figure S27. Positive mass spectra ( $m/z$  200–660) of the compound **B** at CE = 0, 20 and 40 V, respectively (from top to the bottom) in the TIC chromatogram of the *A. maculatum* extract.
